# Supplementary material for: Synthesis of Sulfonated Polyphenylene Block Copolymers via In Situ Generation of Ni(0)
Source: MDPI journal article supplement (doi:10.3390/polym15061577), 2023-03-22
Supplement: s1 [file s1]

**Supporting Information**

# **Synthesis of Sulfonated Polyphenylene Block Copolymers via In Situ Generation of Ni(0)**

**Vikrant Yadav <sup>1</sup>, Farid Wijaya <sup>1,2</sup>, Hyejin Lee <sup>1</sup>, Byungchan Bae <sup>1,2,\*</sup> and Dongwon Shin <sup>1,2,\*</sup>**

<sup>1</sup> Fuel Cell Laboratory, Korea Institute of Energy Research, Daejeon 34129, Republic of Korea; yadav.vikrant003@gmail.com (V.Y.); faridw@kier.re.kr (F.W.); hyejinlee@kier.re.kr (H.L.)

<sup>2</sup> Hydrogen Energy Engineering, University of Science and Technology, Daejeon 34113, Republic of Korea

\* Correspondence: bcbae@kier.re.kr (B.B.); dwshin@kier.re.kr (D.S.)

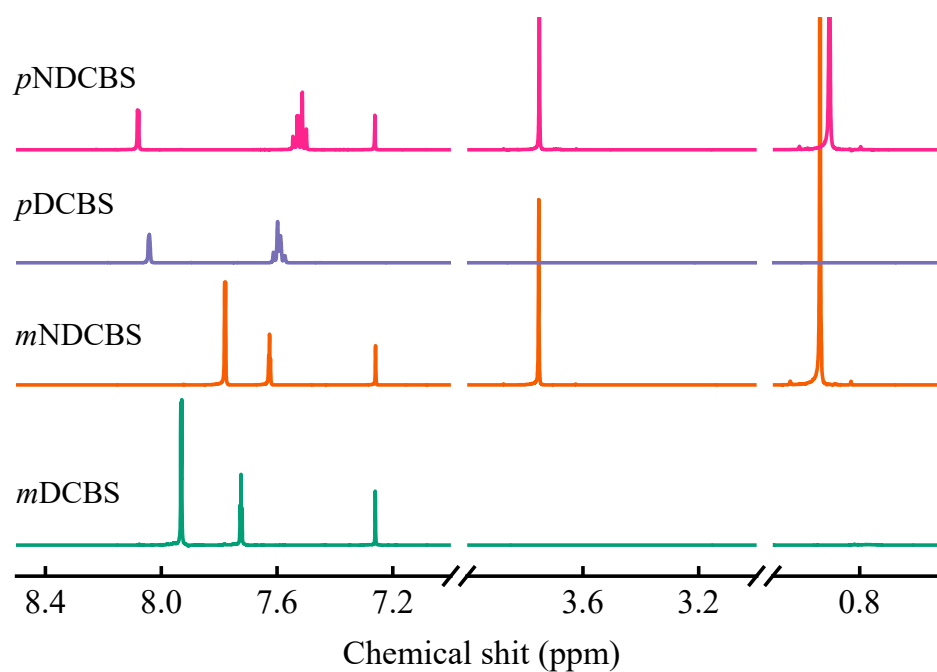

**Figure S1.** <sup>1</sup>H-NMR spectra of 3,5-dichlorobenzene sulfonyl chloride (*m*DCBS), 1-neopentylsulfonyl-3,5-dichlorobenzene (*m*NDCBS), 2,5-dichlorobenzene sulfonyl chloride (*p*DCBS), and 1-neopentylsulfonyl-2,5-dichlorobenzene (*p*NDCBS) recorded in CDCl<sub>3</sub> solution.

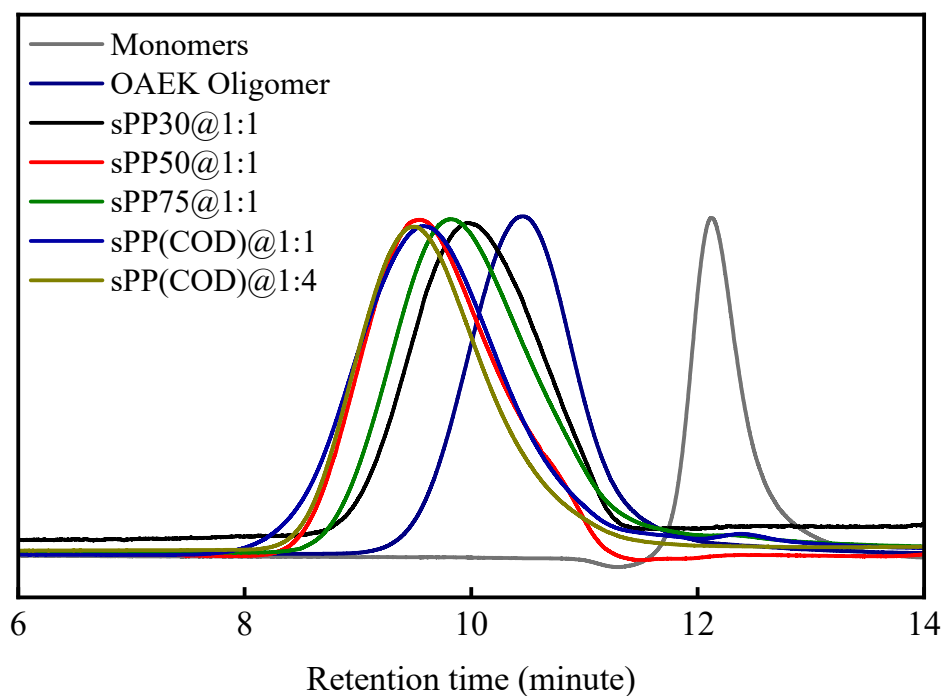

**Figure S2.** Gel permeation chromatography profiles of starting materials [pNDCBS, mNDCBS, and oligo(arylene ether ketone) (OAEK)] and sPP block copolymers catalyzed by different equivalents of  $\text{NiBr}_2(\text{PPh}_3)_2$  [sPP30@1:1, sPP50@1:1, and sPP75@1:1] and  $\text{Ni}(\text{COD})_2$  [sPP(COD)@1:1 and sPP(COD)@1:4] using different molar ratios of pNDCBS and mNDCBS; some properties of these copolymers are summarized in Table 1.

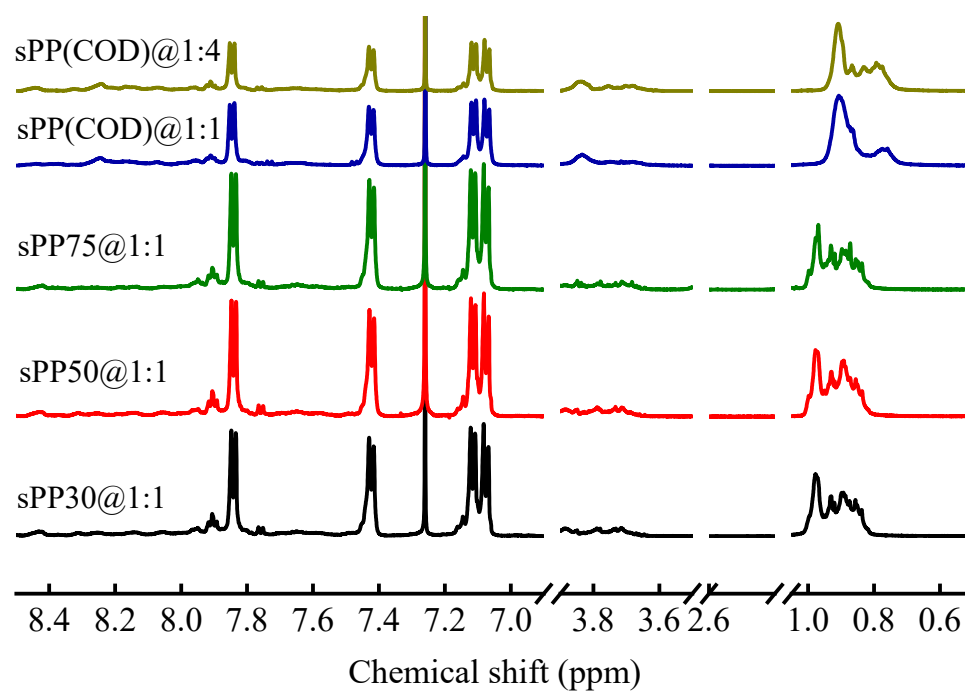

**Figure S3.**  $^1\text{H}$  NMR spectra of block copolymers in their neopentyl protected forms recorded in  $\text{CDCl}_3$ .

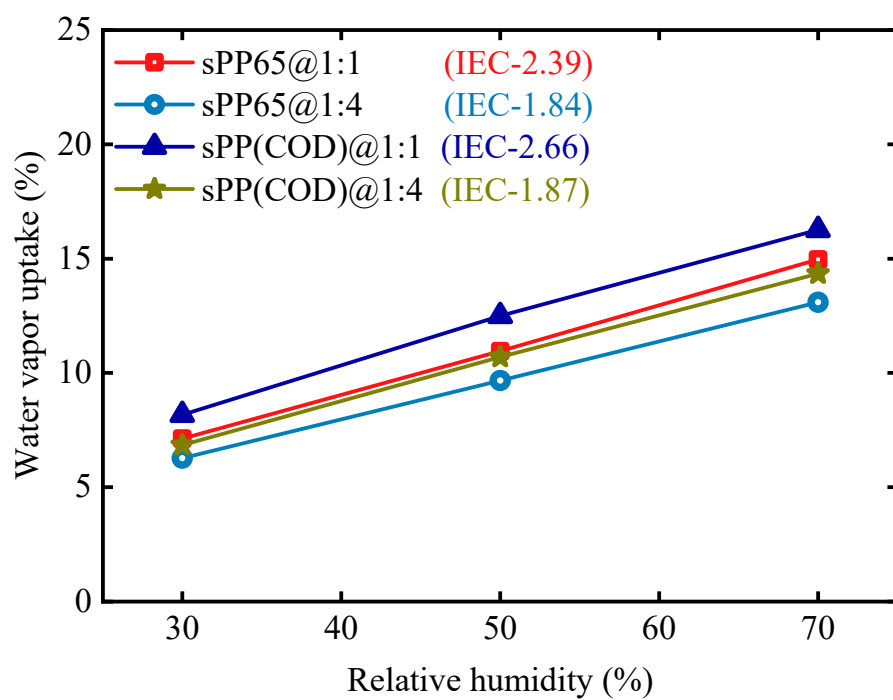

**Figure S4.** Dependence of water vapor uptake of the sPP membranes on the relative humidity measured at 70 °C.

**Table S1.** Summary of Ni(II)-salt-catalyzed polymerization in previous studies and current work

| <b>Poly(phenylene)s</b> | <b>Catalyst</b>                                    | <b>Catalyst<br/>equivalents</b> | <b>Ligand<br/>used</b> | <b>Ligand<br/>equivalents</b> | <b>References</b> |
|-------------------------|----------------------------------------------------|---------------------------------|------------------------|-------------------------------|-------------------|
| SFPP                    | NiCl <sub>2</sub> (PPh <sub>3</sub> ) <sub>2</sub> | 0.030                           | PPh <sub>3</sub>       | 13                            | 1                 |
| PBP-Z                   | NiCl <sub>2</sub> (PPh <sub>3</sub> ) <sub>2</sub> | 0.030                           | PPh <sub>3</sub>       | 12                            | 7                 |
| sPP-b-PES               | NiBr <sub>2</sub>                                  | 0.070                           | PPh <sub>3</sub>       | 07                            | 8                 |
| sPP-b-PKS               | NiBr <sub>2</sub>                                  | 0.070                           | PPh <sub>3</sub>       | 07                            | 8                 |
| sPP-b-PPSU              | NiBr <sub>2</sub>                                  | 0.070                           | PPh <sub>3</sub>       | 07                            | 8                 |
| sPP-b-PPES              | NiBr <sub>2</sub>                                  | 0.070                           | PPh <sub>3</sub>       | 07                            | 8                 |
| PTSP-b-PAESs            | NiBr <sub>2</sub>                                  | 0.200                           | PPh <sub>3</sub>       | 10                            | 9                 |
| PPBPs                   | NiCl <sub>2</sub> (PPh <sub>3</sub> ) <sub>2</sub> | 0.033                           | PPh <sub>3</sub>       | 12                            | 12                |
| PES                     | NiCl <sub>2</sub>                                  | 0.050                           | PPh <sub>3</sub>       | 24                            | 21                |
| PEEK                    | NiCl <sub>2</sub>                                  | 0.050                           | PPh <sub>3</sub>       | 02                            | 26                |
| PAPO                    | NiCl <sub>2</sub>                                  | 0.050                           | PPh <sub>3</sub>       | 02                            | 27                |
| sPP65@1:1               | NiBr <sub>2</sub> (PPh <sub>3</sub> ) <sub>2</sub> | 0.065                           | PPh <sub>3</sub>       | 10                            | This work         |
| sPP65@1:4               | NiBr <sub>2</sub> (PPh <sub>3</sub> ) <sub>2</sub> | 0.065                           | PPh <sub>3</sub>       | 10                            | This work         |

SFPP - Poly(4-phenoxybenzoyl-1,4-phenylene) with 1,1,2,2-tetrafluoro-2-oxyethane-1-sulfonic acid; PBP-Z - poly(2,5-benzophenone-co-4'-fluorine-2,5-benzophenone); sPP-b-PES – No abbreviation provided; sPP-b-PKS - No abbreviation provided; sPP-b-PPSU - No abbreviation provided; sPP-b-PPES - No abbreviation provided; PTSP-b-PAESs - poly(tri-sulfonated phenylene)-block-poly(arylene ether sulfone) copolymers; PPBPs - poly(4-phenoxybenzoyl-1,4-phenylene)s; PES – poly(ether sulfone)s; PEEK - poly(ether ketone)s; PAPO - poly(arylene phosphine oxide).
